# Supplementary material
Source: publisher figshare collection journal article supplement (https://karger.figshare.com/articles/dataset/_/5121220)
Supplement: Supplementary file 1 [file 1]

Suppl. table 1

| Chromosome | first probe (bp) | last (bp)   | length (bp) | RefSeq genes*                                                                                                 |
|------------|------------------|-------------|-------------|---------------------------------------------------------------------------------------------------------------|
| chr4       | 117.142.001      | 117.425.501 | 283.500     | GIMAP7<br>GIMAP4<br>GIMAP1<br>MGC154956                                                                       |
| chr5       | 9.532.001        | 10.078.001  | 546.000     | SYT1<br>LOC751809<br>CD163L1                                                                                  |
| chr5       | 63.180.001       | 63.473.001  | 293.000     | none                                                                                                          |
| chr5       | 109.241.501      | 110.013.001 | 771.500     | none                                                                                                          |
| chr8       | 73.217.001       | 73.961.316  | 744.315     | MGC139169<br>RHOBTB2<br>CHMP7<br>LOXL2                                                                        |
| chr15      | 48.084.501       | 48.147.001  | 62.500      | none                                                                                                          |
| chr15      | 79.545.501       | 80.179.001  | 633.500     | none                                                                                                          |
| chr18      | 48.752.001       | 48.840.001  | 88.000      | none                                                                                                          |
| chr18      | 57.134.001       | 57.277.001  | 143.000     | none                                                                                                          |
| chr27      | 6.294.001        | 7.916.001   | 1.622.000   | BTN3A3<br>LOC525599<br>BTNL2<br>BNBD10<br>BNBD10<br>BNBD-4<br>DEFB<br>DEFB7<br>DEFB8<br>LAP<br>DEFB1<br>DEFB5 |

\* The RefSeq genes included in the CNV were derived from UCSC genome browser
