# Supplementary material
Source: publisher figshare collection journal article supplement (https://karger.figshare.com/articles/dataset/_/5121220)
Supplement: Supplementary file 2 [file 1 › 000315891_sm_Figures.pdf]

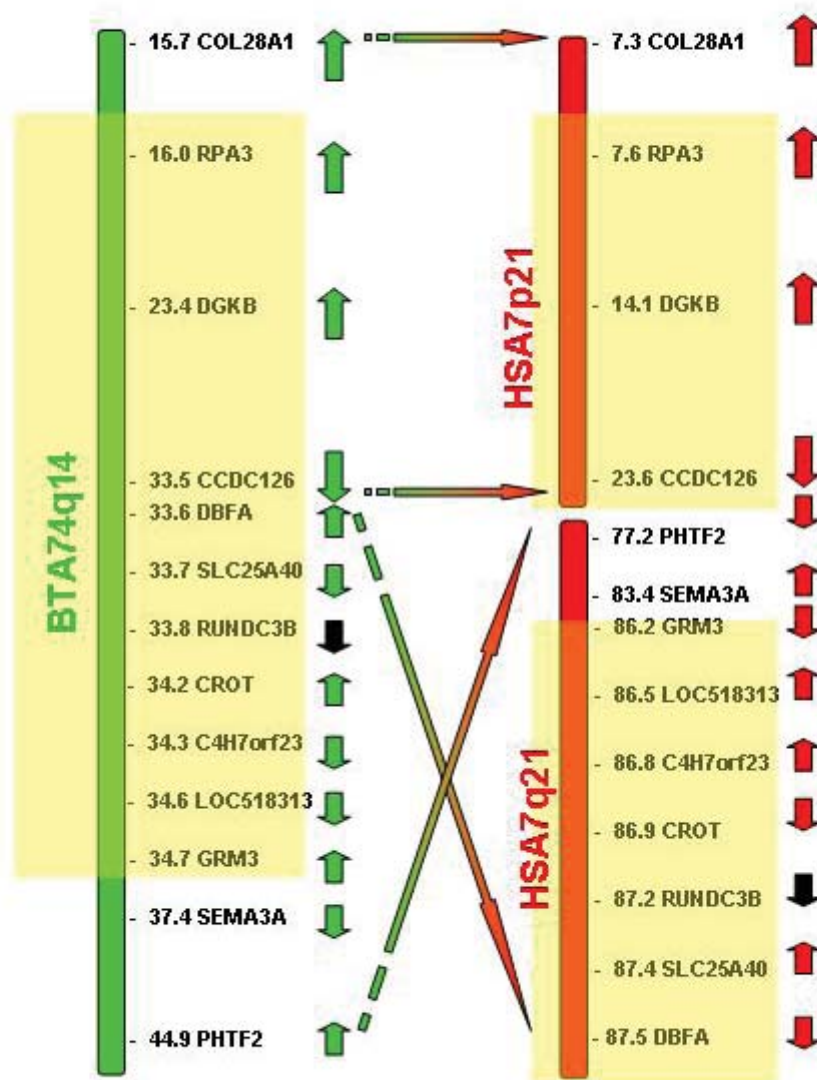

Suppl. Fig. 1. Chromosome homology between BTA4 break point containing region and human genome. Only a part of the genes located in this region is shown. The analysis shows that the cattle 4q14 region is homologous to 2 separated human regions, both located on HSA7, HSA7p21 and HSA7q21. All genes examined followed the right expected orientation, except gene RUNDC3B (this is probably ascribable to a genome assembly error).

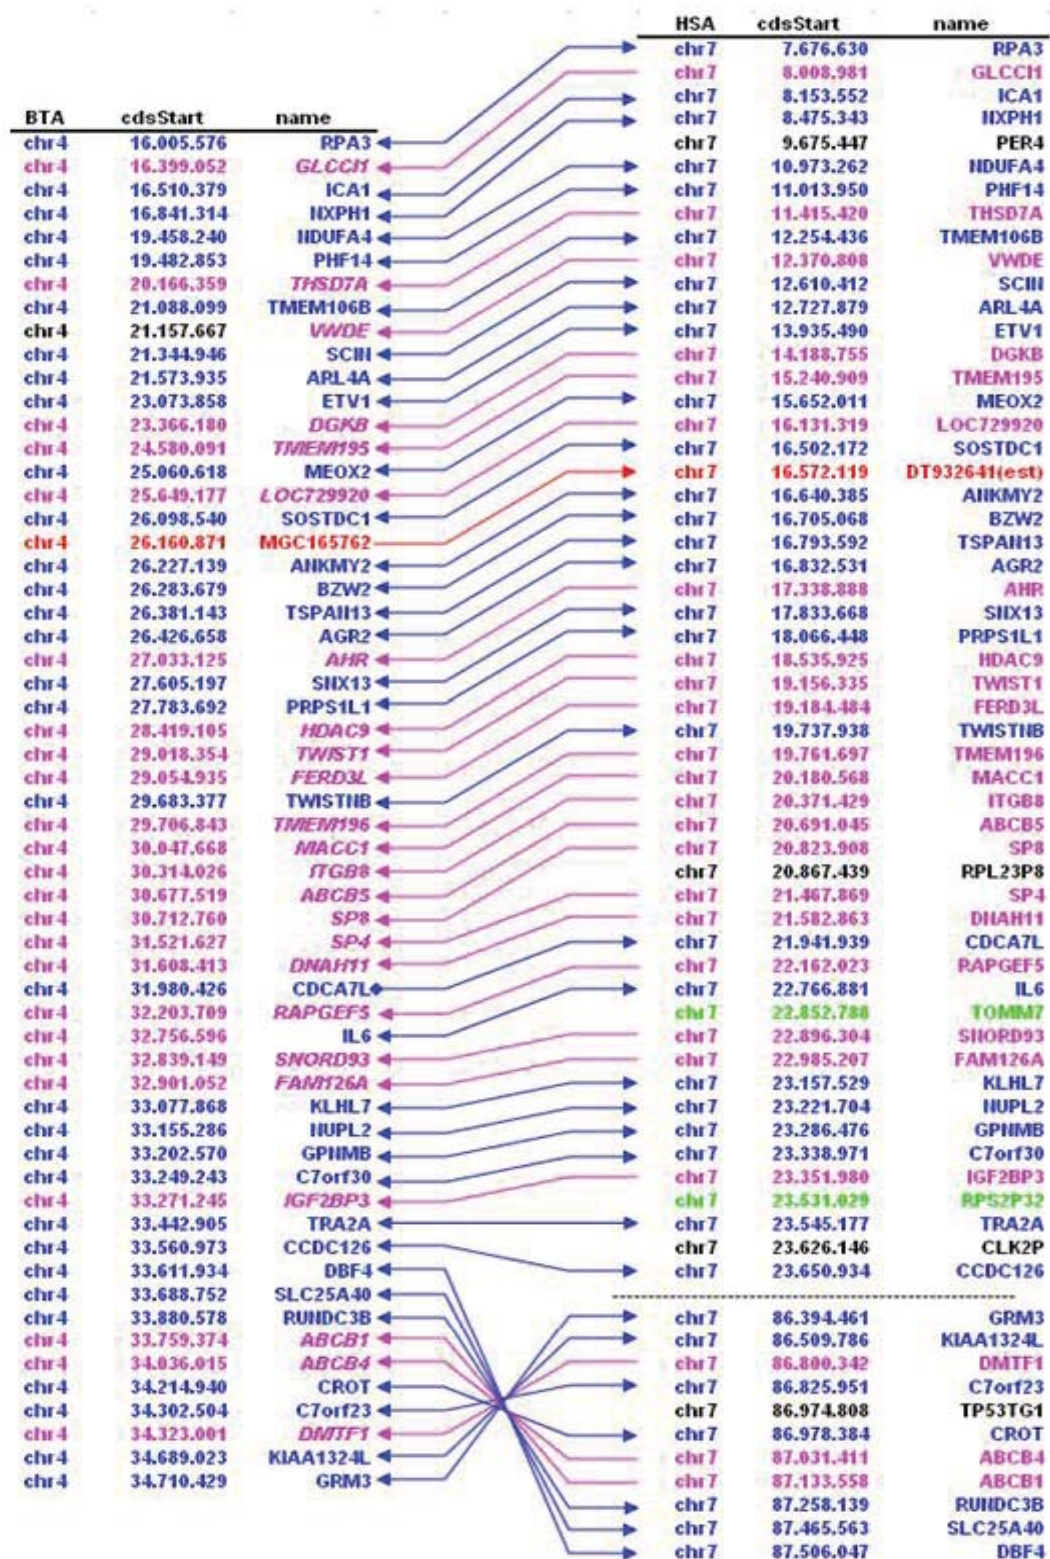

Suppl. Fig. 2. Genes present in BTA4 and HSA7 homologous regions. Genes classified as RefSeq in both cattle and human genomes are in pink. The gene classified as RefSeq in cattle and mapped in human by BLAT comparison software is in red. Genes in black are RefSeq in human and they do not show homology in the cattle genome. Finally human RefSeq genes that map to a different cattle genome chromosome than BTA4 are indicated in green. cdsStart = position of ATG start codon.
